# Supplementary material
Source: publisher figshare collection journal article supplement (https://tandf.figshare.com/ndownloader/files/17412737)
Supplement: Supplementary file 1 [file 17412737]

**Appendix A.** Relevant EPA STAR extramural solicitations since 2005 as they relate to the top 10 under-characterized sources from the NARSTO assessment.
